# Supplementary material
Source: PubMed Central journal article supplement (PMC7785411)
Supplement: mmc1.pdf [file mmc1.pdf]

## **Supplementary Material S1 – Initial search**

**Table S1 – Records retrieved through database searches**

| <b>Source</b>       | <b>Date / Time (GMT) of database search</b> | <b>Hits (Records retrieved)</b> | <b>Search details</b>                                                               |
|---------------------|---------------------------------------------|---------------------------------|-------------------------------------------------------------------------------------|
| MEDLINE (Ovid)      | 28 April 2020 at 14:18 (GMT)                | 225                             | Search strategy attached in <b>S1.1</b>                                             |
| EMBASE (Ovid)       | Searched 28 April 2020 at 16:04             | 232                             | Search strategy attached in <b>S1.2</b>                                             |
| Clinical trials.gov | Searched 28 April 2020 at 16:56             | 6                               | Used the COVID 19 filter in clinicaltrials.gov and sorted by topic. See <b>S1.3</b> |
| WHO database        | Searched 28 April 2020 at 17:42             | 221                             | Downloaded Endnote file on 28 April 2020 from link.* See <b>S1.4</b>                |
| <b>TOTAL</b>        |                                             | <b>684</b>                      |                                                                                     |

\*<https://www.who.int/emergencies/diseases/novel-coronavirus-2019/global-research-on-novel-coronavirus-2019-ncov>

### **S1.1 - MEDLINE ALL (Ovid) -Searched 28 April 2020 at 14:18 (GMT)**

|   |                                                                                                                                                                                                                                                                                                                                                                                                                                                                                                                                                 |       |
|---|-------------------------------------------------------------------------------------------------------------------------------------------------------------------------------------------------------------------------------------------------------------------------------------------------------------------------------------------------------------------------------------------------------------------------------------------------------------------------------------------------------------------------------------------------|-------|
| 1 | exp coronavirus/                                                                                                                                                                                                                                                                                                                                                                                                                                                                                                                                | 12592 |
| 2 | ((corona* or corono*) adj1 (virus* or viral* or virinae*)).ti,ab,kw.                                                                                                                                                                                                                                                                                                                                                                                                                                                                            | 804   |
| 3 | (coronavirus* or coronavirus* or coronavirinae* or Coronavirus* or Coronavirus* or Wuhan* or Hubei* or Huanan or "2019-nCoV" or 2019nCoV or nCoV2019 or "nCoV-2019" or "COVID-19" or COVID19 or "CORVID-19" or CORVID19 or "WN-CoV" or WNCov or "HCoV-19" or HCoV19 or CoV or "2019 novel*" or Ncov or "n-cov" or "SARS-CoV-2" or "SARSCoV-2" or "SARSCoV2" or "SARS-CoV2" or SARSCov19 or "SARS-Cov19" or "SARSCov-19" or "SARS-Cov-19" or Ncovor or Ncorona* or Ncorono* or NcovWuhan* or NcovHubei* or NcovChina* or NcovChinese*).ti,ab,kw. | 23556 |
| 4 |                                                                                                                                                                                                                                                                                                                                                                                                                                                                                                                                                 | 489   |

|    |                                                                                                                                                                                   |        |
|----|-----------------------------------------------------------------------------------------------------------------------------------------------------------------------------------|--------|
|    | ((respiratory* adj2 (symptom* or disease* or illness* or condition*)) or "seafood market*" or "food market*") adj10 (Wuhan* or Hubei* or China* or Chinese* or Huanan*).ti,ab,kw. |        |
| 5  | ((outbreak* or wildlife* or pandemic* or epidemic*) adj1 (China* or Chinese* or Huanan*).ti,ab,kw.                                                                                | 189    |
| 6  | "severe acute respiratory syndrome*".ti,ab,kw.                                                                                                                                    | 5429   |
| 7  | or/1-6                                                                                                                                                                            | 30255  |
| 8  | Kidney Diseases/                                                                                                                                                                  | 83306  |
| 9  | exp Renal Replacement Therapy/                                                                                                                                                    | 208782 |
| 10 | Renal Insufficiency/                                                                                                                                                              | 15645  |
| 11 | exp Renal Insufficiency, Chronic/                                                                                                                                                 | 113463 |
| 12 | exp Acute Kidney Injury/                                                                                                                                                          | 45609  |
| 13 | aki.tw.                                                                                                                                                                           | 11922  |
| 14 | ((kidney or renal) adj injur\$).tw.                                                                                                                                               | 35588  |
| 15 | (end stage kidney or end stage renal or endstage kidney or endstage renal).tw.                                                                                                    | 41096  |
| 16 | (kidney disease* or renal disease* or kidney failure or renal failure).tw.                                                                                                        | 205646 |
| 17 | (ESKD or ESKF or ESRD or ESRF).tw.                                                                                                                                                | 17783  |
| 18 | (CKF or CKD or CRF or CRD).tw.                                                                                                                                                    | 45670  |

|    |                                                            |        |
|----|------------------------------------------------------------|--------|
| 19 | (CAPD or CCPD or APD).tw.                                  | 11566  |
| 20 | (pre-renal or prerenal).tw.                                | 1107   |
| 21 | anti-gbm.tw.                                               | 1398   |
| 22 | Hemorrhagic Fever with Renal Syndrome/                     | 2582   |
| 23 | (tubul* adj (injury or necrosis or damage)).tw.            | 10806  |
| 24 | h?emolytic ur?emi\$.tw.                                    | 7363   |
| 25 | *Hemolytic-Uremic Syndrome/                                | 4080   |
| 26 | (oliguri\$ or anuri\$).mp.                                 | 10661  |
| 27 | Kidney Cortex Necrosis/                                    | 886    |
| 28 | (kidney\$ or nephropath\$ or renal or uropathy).tw.        | 876531 |
| 29 | (anti-glomerular or antiglomerular).mp.                    | 3212   |
| 30 | (microalbuminuri* or macroalbuminuri* or albuminuria*).tw. | 18219  |
| 31 | Renal Dialysis/                                            | 90405  |
| 32 | Hemodialysis, Home/                                        | 1917   |
| 33 | dialysis.tw.                                               | 105817 |

|    |                                                                                                                     |         |
|----|---------------------------------------------------------------------------------------------------------------------|---------|
| 34 | (uremia or uraemia).tw.                                                                                             | 10569   |
| 35 | (hemodialysis or haemodialysis or hemofiltration or haemofiltration or hemodiafiltration or haemodiafiltration).tw. | 79696   |
| 36 | (acetate free adj2 biofiltration).tw.                                                                               | 115     |
| 37 | (predialysis or pre dialysis).tw.                                                                                   | 4978    |
| 38 | (glomerular filtration rate or glomerular sclerosis).tw.                                                            | 43787   |
| 39 | or/8-38                                                                                                             | 1062163 |
| 40 | 7 and 39                                                                                                            | 987     |
| 41 | limit 40 to yr="2019 -Current"                                                                                      | 225     |

### S1.2- EMBASE (Ovid) -Searched 28 April 2020 at 16:04 (GMT)

|   |                                                                                                                                                                                                                                                                                                                                                                                                                                                                                                                                                 |       |
|---|-------------------------------------------------------------------------------------------------------------------------------------------------------------------------------------------------------------------------------------------------------------------------------------------------------------------------------------------------------------------------------------------------------------------------------------------------------------------------------------------------------------------------------------------------|-------|
| 1 | exp coronavirus/                                                                                                                                                                                                                                                                                                                                                                                                                                                                                                                                | 13134 |
| 2 | ((corona* or corono*) adj1 (virus* or viral* or virinae*)).ti,ab,kw.                                                                                                                                                                                                                                                                                                                                                                                                                                                                            | 631   |
| 3 | (coronavirus* or coronovirus* or coronavirinae* or Coronavirus* or Coronovirus* or Wuhan* or Hubei* or Huanan or "2019-nCoV" or 2019nCoV or nCoV2019 or "nCoV-2019" or "COVID-19" or COVID19 or "CORVID-19" or CORVID19 or "WN-CoV" or WNCov or "HCoV-19" or HCoV19 or CoV or "2019 novel*" or Ncov or "n-cov" or "SARS-CoV-2" or "SARSCoV-2" or "SARSCoV2" or "SARS-CoV2" or SARSCov19 or "SARS-Cov19" or "SARSCov-19" or "SARS-Cov-19" or Ncovor or Ncorona* or Ncorono* or NcovWuhan* or NcovHubei* or NcovChina* or NcovChinese*).ti,ab,kw. | 24633 |
| 4 | ((((respiratory* adj2 (symptom* or disease* or illness* or condition*)) or "seafood market*" or "food market*") adj10 (Wuhan* or Hubei* or China* or Chinese* or Huanan*)).ti,ab,kw.                                                                                                                                                                                                                                                                                                                                                            | 578   |
| 5 |                                                                                                                                                                                                                                                                                                                                                                                                                                                                                                                                                 | 83    |

|    |                                                                                                     |        |
|----|-----------------------------------------------------------------------------------------------------|--------|
|    | ((outbreak* or wildlife* or pandemic* or epidemic*) adj1 (China* or Chinese* or Huanan*)).ti,ab,kw. |        |
| 6  | "severe acute respiratory syndrome*".ti,ab,kw.                                                      | 5554   |
| 7  | or/1-6                                                                                              | 31582  |
| 8  | Kidney Diseases/                                                                                    | 25504  |
| 9  | exp Renal Replacement Therapy/                                                                      | 185177 |
| 10 | Renal Insufficiency/                                                                                | 53384  |
| 11 | exp Renal Insufficiency, Chronic/                                                                   | 93179  |
| 12 | exp Acute Kidney Injury/                                                                            | 81206  |
| 13 | aki.tw                                                                                              | 55380  |
| 14 | ((kidney or renal) adj injur\$).tw.                                                                 | 58702  |
| 15 | (end stage kidney or end stage renal or endstage kidney or endstage renal).tw.                      | 295787 |
| 16 | (kidney disease* or renal disease* or kidney failure or renal failure).tw.                          | 29078  |
| 17 | (ESKD or ESKF or ESRD or ESRF).tw.                                                                  | 73689  |
| 18 | (CKF or CKD or CRF or CRD).tw.                                                                      | 15508  |
| 19 | (CAPD or CCPD or APD).tw.                                                                           | 1788   |

|    |                                                            |         |
|----|------------------------------------------------------------|---------|
| 20 | (pre-renal or prerenal).tw.                                | 2105    |
| 21 | anti-gbm.tw.                                               | 745     |
| 22 | Hemorrhagic Fever with Renal Syndrome/                     | 14584   |
| 23 | (tubul* adj (injury or necrosis or damage)).tw.            | 9676    |
| 24 | h?emolytic ur?emi\$.tw.                                    | 5840    |
| 25 | *Hemolytic-Uremic Syndrome/                                | 17178   |
| 26 | (oliguri\$ or anuri\$).mp.                                 | 621     |
| 27 | Kidney Cortex Necrosis/                                    | 1156492 |
| 28 | (kidney\$ or nephropath\$ or renal or uropathy).tw.        | 2213    |
| 29 | (anti-glomerular or antiglomerular).mp.                    | 26386   |
| 30 | (microalbuminuri* or macroalbuminuri* or albuminuria*).tw. | 86555   |
| 31 | Renal Dialysis/                                            | 2458    |
| 32 | Hemodialysis, Home/                                        | 146168  |
| 33 | dialysis.tw.                                               | 11561   |
| 34 | (uremia or uraemia).tw.                                    | 110623  |

|    |                                                                                                                     |         |
|----|---------------------------------------------------------------------------------------------------------------------|---------|
| 35 | (hemodialysis or haemodialysis or hemofiltration or haemofiltration or hemodiafiltration or haemodiafiltration).tw. | 150     |
| 36 | (acetate free adj2 biofiltration).tw.                                                                               | 7208    |
| 37 | (predialysis or pre dialysis).tw.                                                                                   | 61891   |
| 38 | (glomerular filtration rate or glomerular sclerosis).tw.                                                            | 185177  |
| 39 | or/1-30                                                                                                             | 1386787 |
| 40 | 7 and 39                                                                                                            | 1169    |
| 41 | limit 40 to yr="2019 -Current"                                                                                      | 232     |

### S1.3 - Clinicaltrials.gov

| Terms                                           | Search Results* | Entire Database** |
|-------------------------------------------------|-----------------|-------------------|
| Synonyms                                        |                 |                   |
| <b>COVID-19</b>                                 | 3 studies       | 997 studies       |
| 2019 novel coronavirus                          | --              | 20 studies        |
| 2019-nCoV                                       | --              | 34 studies        |
| SARS-CoV-2                                      | --              | 352 studies       |
| severe acute respiratory syndrome coronavirus 2 | --              | 25 studies        |
| Wuhan coronavirus                               | --              | 1 studies         |
| <b>Acute Kidney Injury</b>                      | 3 studies       | 903 studies       |
| Acute injury of kidney                          | --              | 1 studies         |
| Acute Kidney Failures                           | --              | 43 studies        |
| Acute Renal Failures                            | --              | 158 studies       |
| Acute Renal Injuries                            | --              | 21 studies        |
| acute renal insufficiency                       | --              | 9 studies         |
| <b>Kidney Diseases</b>                          | 3 studies       | 8,489 studies     |
| Disease of kidney                               | --              | 1 studies         |
| kidney disorder                                 | --              | 3 studies         |
| Nephropathy                                     | --              | 867 studies       |
| Renal disease                                   | --              | 1,217 studies     |
| Renal disorder                                  | --              | 4 studies         |
| <b>Renal Insufficiency</b>                      | 3 studies       | 4,861 studies     |
| Impaired renal function                         | --              | 107 studies       |
| impairment renal                                | --              | 1 studies         |
| Insufficiency renal                             | --              | 1 studies         |

|                                     |           |                |
|-------------------------------------|-----------|----------------|
| Kidney Failure                      | --        | 1,750 studies  |
| Kidney Impairment                   | --        | 7 studies      |
| Kidney Insufficiency                | --        | 28 studies     |
| Renal dysfunction                   | --        | 110 studies    |
| Renal Failure                       | --        | 857 studies    |
| Renal impairment                    | --        | 425 studies    |
| <b>Urologic Diseases</b>            | 3 studies | 11,576 studies |
| diseases of the urinary system      | --        | 1 studies      |
| Urinary Tract Disease               | --        | 9 studies      |
| urinary tract disorder              | --        | 1 studies      |
| Urological Disease                  | --        | 11 studies     |
| Urological disorder                 | --        | 2 studies      |
| Uropathy                            | --        | 8 studies      |
| <b>Nephritis</b>                    | 1 studies | 500 studies    |
| Inflammation of kidney              | --        | 1 studies      |
| <b>Renal Insufficiency, Chronic</b> | 2 studies | 3,044 studies  |
| Chronic Kidney Insufficiencies      | --        | 15 studies     |
| Chronic renal impairment            | --        | 5 studies      |
| Chronic Renal Insufficiencies       | --        | 105 studies    |

#### S1.4 – WHO database

|   |                                                                                                           |     |
|---|-----------------------------------------------------------------------------------------------------------|-----|
| 1 | Kidney OR Renal (abstract)                                                                                | 155 |
| 2 | AKI OR ESKD OR ESKF OR ESRD OR ESRF OR CKF OR CKD OR CRF OR CRD OR CAPD (abstract / Match case)           | 12  |
| 3 | CCPD OR APD (abstract / Match case)                                                                       | 0   |
| 4 | microalbuminuri* OR macroalbuminuri* OR albuminuria* (All fields)                                         | 2   |
| 5 | Dialysis OR haemodialysis OR hemofiltration OR haemofiltration OR hemodiafiltration OR haemodiafiltration | 52  |

#### Appendix S1.5



| Databases [Platform] Searches run April 28th 2020 | Results    |
|---------------------------------------------------|------------|
| China National Knowledge Infrastructure           | 43         |
| Wanfang database                                  | 21         |
| Chinese Biomedical Literature database            | 49         |
| Chinese Medical Journal Network (manually search) | 6          |
| Chinese Clinical Trial Register (manually search) | 9          |
| <b>TOTAL</b>                                      | <b>128</b> |
| <b>Duplicated</b>                                 | <b>19</b>  |

### S1.6 - China National Knowledge Infrastructure < April 28th 2020>

#1 SU = COVID-19 OR SU=COVID19 OR SU=COVID-19 OR SU=COVID-2019 OR SU=SARS-CoV-19 OR SU=SARS-CoV-2019 OR SU=SARS-CoV-2 OR SU=SARS2 OR SU=2019-nCoV OR SU=严重急性呼吸综合征冠状病毒2型 OR SU=冠状病毒感染 OR SU=武汉冠状病毒 OR SU=武汉海鲜市场肺炎病毒 OR SU=冠状病毒2019 OR SU=2019新型冠状病毒 OR SU=2019新型冠状病毒感染 OR SU=2019冠状病毒 OR SU=新型冠状病毒-19 OR SU=冠状病毒 limited time to 2019.12.01 to 2020.04.28 (13741)

#2 SU = 慢性肾脏病 OR SU=慢性肾功能衰竭 OR SU=慢性肾功能不全 OR SU=慢性肾衰竭 OR SU=慢性肾衰 OR SU=慢性肾小球 OR SU=慢性肾炎 OR SU=进行性肾病 OR SU=进行性肾小球 OR SU=性肾病 OR SU=糖尿病肾病 OR SU=糖尿病肾小球 OR SU=透析 OR SU=血液透析 OR SU=尿毒症 OR SU=尿嘧啶 OR SU=蛋白尿 OR SU=肾硬化 OR SU=肾小球硬化症 OR SU=肾小球滤过率 OR SU=血尿 OR SU=钙化异常 OR SU=继发性甲状旁腺功能亢进 OR SU=肾小管间质纤维化 OR SU=间质纤维化 OR SU=肾纤维化 OR SU=高磷血症 OR SU=血管钙化 OR SU=肾小球病 OR SU=多囊肾 OR SU=囊性肾 OR SU=肾病 OR SU=肾衰竭 OR SU=肾功能 OR SU=肾功能不全 OR SU=肾替代 OR SU=甲状旁腺功能亢进 OR SU=肾脏移植 OR SU=肾移植 OR SU=输尿管阻塞 OR SU=肾炎 OR SU=肾小球肾炎 limited time to 2019.12.01 to 2020.04.28 (4038)

#3 #1 AND #2 (43)

### S1.7 - Wanfang database < April 28th 2020>

#1 主题:COVID-19 OR 主题:COVID19 OR 主题:COVID-19 OR 主题:COVID-2019 OR 主题:SARS-CoV-19 OR 主题:SARS-CoV-2019 OR 主题:SARS-CoV-2 OR 主题:SARS2 OR 主题:2019-nCoV OR 主题:严重急性呼吸综合征冠状病毒2型 OR 主题:冠状病毒感染 OR 主题:武汉冠状病毒 OR 主题:武汉海鲜市场肺炎病毒 OR 主题:冠状病毒2019 OR 主题:2019新型冠状病毒 OR 主题:2019新型冠状病毒感染 OR 主题:2019冠状病毒 OR 主题:新型冠状病毒-19 OR 主题:冠状病毒 limited time to 2019 to 2020.04.28 (3039)

#2 主题:慢性肾脏病 OR 主题:慢性肾功能衰竭 OR 主题:慢性肾功能不全 OR 主题:慢性肾衰竭 OR 主题:慢性肾衰 OR 主题:慢性肾小球 OR 主题:慢性肾炎 OR 主题:进行性肾病 OR 主题:进行性肾小球 OR 主题:性肾病 OR 主题:糖尿病肾病 OR 主题:糖尿病肾小球 OR 主题:透析 OR 主题:血液透析

OR 主题:尿毒症 OR 主题:尿嘧啶 OR 主题:蛋白尿 OR 主题:肾硬化 OR 主题:肾小球硬化症 OR 主题:肾小球滤过率 OR 主题:血尿 OR 主题:钙化异常 OR 主题:继发性甲状旁腺功能亢进 OR 主题:肾小管间质纤维化 OR 主题:间质纤维化 OR 主题:肾纤维化 OR 主题:高磷血症 OR 主题:血管钙化 OR 主题:肾小球病 OR 主题:多囊肾 OR 主题:囊性肾 OR 主题:肾病 OR 主题:肾衰竭 OR 主题:肾功能 OR 主题:肾功能不全 OR 主题:肾替代 OR 主题:甲状旁腺功能亢进 OR 主题:肾脏移植 OR 主题:肾移植 OR 主题:输尿管阻塞 OR 主题:肾炎 OR 主题:肾小球肾炎 limited time to 2019 to 2020.04.28 (30814)

#3 #1 AND #2 (21)

### S1.8 - Chinese Biomedical Literature database< April 28th 2020>

#1 : (( "COVID-19"[常用字段:智能] OR " COVID19"[常用字段:智能] OR " COVID-19"[常用字段:智能] ] OR " COVID-2019"[常用字段:智能] OR " SARS-CoV-19"[常用字段:智能] OR " SARS-CoV-2019"[常用字段:智能] OR " SARS-CoV-2"[常用字段:智能] OR " SARS2"[常用字段:智能] OR " 2019-nCoV"[常用字段:智能] OR " 严重急性呼吸综合征冠状病毒2型"[常用字段:智能] OR " 冠状病毒感染"[常用字段:智能] OR " 武汉冠状病毒"[常用字段:智能] OR " 武汉海鲜市场肺炎病毒"[常用字段:智能] OR " 冠状病毒2019"[常用字段:智能] OR " 2019新型冠状病毒"[常用字段:智能] OR " 2019新型冠状病毒感染"[常用字段:智能] OR " 2019冠状病毒"[常用字段:智能] OR " 新型冠状病毒-19"[常用字段:智能] OR " 冠状病毒"[常用字段:智能])) AND 2019-2020[日期] (9344)

#2 : (( "慢性肾脏病"[常用字段:智能] OR " 慢性肾功能衰竭"[常用字段:智能] OR " 慢性肾功能不全"[常用字段:智能] OR " 慢性肾衰竭"[常用字段:智能] OR " 慢性肾衰"[常用字段:智能] OR " 慢性肾小球"[常用字段:智能] OR " 慢性肾炎"[常用字段:智能] OR " 进行性肾病"[常用字段:智能] OR " 进行性肾小球"[常用字段:智能] OR " 性肾病"[常用字段:智能] OR " 糖尿病肾病"[常用字段:智能] OR " 糖尿病肾小球"[常用字段:智能] OR " 透析"[常用字段:智能] OR " 血液透析"[常用字段:智能] OR " 尿毒症"[常用字段:智能] OR " 尿嘧啶"[常用字段:智能] OR " 蛋白尿"[常用字段:智能] OR " 肾硬化"[常用字段:智能] OR " 肾小球硬化症"[常用字段:智能] OR " 肾小球滤过率"[常用字段:智能] OR " 血尿"[常用字段:智能] OR " 钙化异常"[常用字段:智能] OR " 继发性甲状旁腺功能亢进"[常用字段:智能] OR " 肾小管间质纤维化"[常用字段:智能] OR " 间质纤维化"[常用字段:智能] OR " 肾纤维化"[常用字段:智能] OR " 高磷血症"[常用字段:智能] OR " 血管钙化"[常用字段:智能] OR " 肾小球病"[常用字段:智能] OR " 多囊肾"[常用字段:智能] OR " 囊性肾"[常用字段:智能] OR " 肾病"[常用字段:智能] OR " 肾衰竭"[常用字段:智能] OR " 肾功能"[常用字段:智能] OR " 肾功能不全 "[常用字段:智能] OR " 肾替代"[常用字段:智能] OR " 甲状旁腺功能亢进"[常用字段:智能] OR " 肾脏移植"[常用字段:智能] OR " 肾移植"[常用字段:智能] OR " 输尿管阻塞"[常用字段:智能] OR " 肾炎"[常用字段:智能] OR " 肾小球肾炎"[常用字段:智能])) AND 2019-2020[日期] (26733)

#3 #1 AND #2 (49)

## Supplementary Material S2 – Updated searches

Table S2 – Records retrieved through database searches

| Source              | Date / Time (GMT) of database search | Hits (Records retrieved) | Search details                          |
|---------------------|--------------------------------------|--------------------------|-----------------------------------------|
| MEDLINE (Ovid)      | 04 August 2020 at 14:20 (GMT)        | 181                      | Search strategy attached in <b>S2.1</b> |
| EMBASE (Ovid)       | Searched 04 August 2020 at 14:15     | 221                      | Search strategy attached in <b>S2.4</b> |
| bioRxiv and medRxiv | Searched 04 August 2020 at 14:27     | 15                       | Search strategy attached in <b>S2.3</b> |
| WHO database        | Searched 04 August 2020 at 14:52     | 148                      | Search strategy attached in <b>S2.2</b> |
| <b>TOTAL</b>        |                                      | 565                      |                                         |

### S2.1 - MEDLINE ALL (Ovid) -Searched 04 August 2020 at 14:20 (GMT)

| #  | Searches                                                                                                                                                                                                                                                                                                                                                                                                                                                                                                                                        | Results |
|----|-------------------------------------------------------------------------------------------------------------------------------------------------------------------------------------------------------------------------------------------------------------------------------------------------------------------------------------------------------------------------------------------------------------------------------------------------------------------------------------------------------------------------------------------------|---------|
| 1  | exp coronavirus/                                                                                                                                                                                                                                                                                                                                                                                                                                                                                                                                | 24093   |
| 2  | ((corona* or corono*) adj1 (virus* or viral* or virinae*)).ti,ab,kw.                                                                                                                                                                                                                                                                                                                                                                                                                                                                            | 1416    |
| 3  | (coronavirus* or coronovirus* or coronavirinae* or Coronavirus* or Coronovirus* or Wuhan* or Hubei* or Huanan or "2019-nCoV" or 2019nCoV or nCoV2019 or "nCoV-2019" or "COVID-19" or COVID19 or "CORVID-19" or CORVID19 or "WN-CoV" or WNCov or "HCoV-19" or HCoV19 or CoV or "2019 novel*" or Ncov or "n-cov" or "SARS-CoV-2" or "SARSCoV-2" or "SARSCoV2" or "SARS-CoV2" or SARSCov19 or "SARS-Cov19" or "SARSCov-19" or "SARS-Cov-19" or Ncover or Ncorona* or Ncorono* or NcovWuhan* or NcovHubei* or NcovChina* or NcovChinese*).ti,ab,kw. | 54755   |
| 4  | ((((respiratory* adj2 (symptom* or disease* or illness* or condition*)) or "seafood market*" or "food market*") adj10 (Wuhan* or Hubei* or China* or Chinese* or Huanan*)).ti,ab,kw.                                                                                                                                                                                                                                                                                                                                                            | 560     |
| 5  | ((outbreak* or wildlife* or pandemic* or epidemic*) adj1 (China* or Chinese* or Huanan*)).ti,ab,kw.                                                                                                                                                                                                                                                                                                                                                                                                                                             | 227     |
| 6  | "severe acute respiratory syndrome*".ti,ab,kw.                                                                                                                                                                                                                                                                                                                                                                                                                                                                                                  | 8902    |
| 7  | or/1-6                                                                                                                                                                                                                                                                                                                                                                                                                                                                                                                                          | 61766   |
| 8  | Kidney Transplantation/                                                                                                                                                                                                                                                                                                                                                                                                                                                                                                                         | 95332   |
| 9  | (kidney and (transplant\$ or graft\$)).tw.                                                                                                                                                                                                                                                                                                                                                                                                                                                                                                      | 66028   |
| 10 | (renal and (transplant\$ or graft\$)).tw.                                                                                                                                                                                                                                                                                                                                                                                                                                                                                                       | 84679   |
| 11 | or/8-9                                                                                                                                                                                                                                                                                                                                                                                                                                                                                                                                          | 118574  |
| 12 | 7 and 11                                                                                                                                                                                                                                                                                                                                                                                                                                                                                                                                        | 181     |

## S2.2 - World Health Organisation COVID19 database

tw:((tw:("kidney transplant\*")) OR (tw:("renal transplant\*")) OR (tw:("kidney graft\*")) OR (tw:("renal graft\*")))

Hits – 148

## S2.3 -bioRxiv and medRxiv

Kidney transplant\* OR renal transplant\*

Limit by date 31/12/19 to 04/08/20

Hits – 15

## S2.4 - EMBASE (Ovid) -Searched 04 August 2020 at 14:15 (GMT)

| #  | Searches                                                                                                                                                                                                                                                                                                                                                                                                                                                                                                                                        | Results |
|----|-------------------------------------------------------------------------------------------------------------------------------------------------------------------------------------------------------------------------------------------------------------------------------------------------------------------------------------------------------------------------------------------------------------------------------------------------------------------------------------------------------------------------------------------------|---------|
| 1  | exp coronavirus/                                                                                                                                                                                                                                                                                                                                                                                                                                                                                                                                | 17094   |
| 2  | ((corona* or corono*) adj1 (virus* or viral* or virinae*)).ti,ab,kw.                                                                                                                                                                                                                                                                                                                                                                                                                                                                            | 1185    |
| 3  | (coronavirus* or coronovirus* or coronavirinae* or Coronavirus* or Coronovirus* or Wuhan* or Hubei* or Huanan or "2019-nCoV" or 2019nCoV or nCoV2019 or "nCoV-2019" or "COVID-19" or COVID19 or "CORVID-19" or CORVID19 or "WN-CoV" or WNCov or "HCoV-19" or HCoV19 or CoV or "2019 novel*" or Ncov or "n-cov" or "SARS-CoV-2" or "SARSCoV-2" or "SARSCoV2" or "SARS-CoV2" or SARSCov19 or "SARS-Cov19" or "SARSCov-19" or "SARS-Cov-19" or Ncover or Ncorona* or Ncorono* or NcovWuhan* or NcovHubei* or NcovChina* or NcovChinese*).ti,ab,kw. | 57127   |
| 4  | ((respiratory* adj2 (symptom* or disease* or illness* or condition*)) or "seafood market*" or "food market*") adj10 (Wuhan* or Hubei* or China* or Chinese* or Huanan*).ti,ab,kw.                                                                                                                                                                                                                                                                                                                                                               | 680     |
| 5  | ((outbreak* or wildlife* or pandemic* or epidemic*) adj1 (China* or Chinese* or Huanan*).ti,ab,kw.                                                                                                                                                                                                                                                                                                                                                                                                                                              | 109     |
| 6  | "severe acute respiratory syndrome*".ti,ab,kw.                                                                                                                                                                                                                                                                                                                                                                                                                                                                                                  | 9048    |
| 7  | or/1-6                                                                                                                                                                                                                                                                                                                                                                                                                                                                                                                                          | 64366   |
| 8  | Kidney Transplantation/                                                                                                                                                                                                                                                                                                                                                                                                                                                                                                                         | 117042  |
| 9  | (kidney and (transplant\$ or graft\$)).tw.                                                                                                                                                                                                                                                                                                                                                                                                                                                                                                      | 109925  |
| 10 | (renal and (transplant\$ or graft\$)).tw.                                                                                                                                                                                                                                                                                                                                                                                                                                                                                                       | 132576  |
| 11 | or/8-9                                                                                                                                                                                                                                                                                                                                                                                                                                                                                                                                          | 169509  |
| 12 | 7 and 11                                                                                                                                                                                                                                                                                                                                                                                                                                                                                                                                        | 221     |

## **Supplementary Material S3 – Example data request**

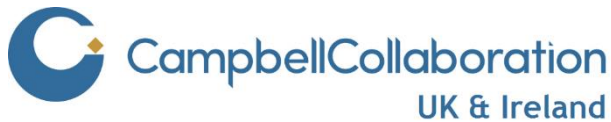

May 20, 2020

### **Re: Request for data from “COVID-19 in solid organ transplant recipients: Initial report from the US epicenter”**

Dear Dr Pereira,

We are working on a rapid systematic review “**Novel coronavirus (2019-nCoV) pneumonia in patients with Chronic Kidney Disease**” by Fogarty et al., and we are delighted that your paper has met the eligibility criteria to be included in our paper.

You reported there were 46 kidney transplant recipients, 3 heart-kidney transplant recipients, 1 liver-kidney recipient, 1 pancreas-kidney recipient, 57 patients with CKD and 5 patients on dialysis at baseline. As your analysis of outcomes only included those who were hospitalised, please could you clarify how many of these belonged to those specific groups? We would be grateful if you could share your baseline demographics, laboratory values, treatment and outcomes data specifically for these groups. We are happy to receive this either in the form of disaggregated anonymised data or in a summarised format as presented in your paper. Please let us know if you will be able to provide this by **Thursday 4 June 2020**.

Sincerely,

A handwritten signature in black ink, appearing to read 'Ciara Keenan'.

Dr Ciara Keenan

#### **On behalf of the review team**

Dr Damian Fogarty (corresponding author)

Prof Kehu Yang

Dr Laurie Tomlinson

Dr Long Ge

Ms Liangying Hou

Dr Viyaasan Mahalingasivam

Dr Alison Craik

Ms Qi Wang

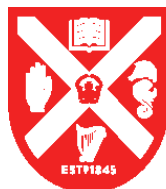

**QUEEN'S  
UNIVERSITY  
BELFAST**

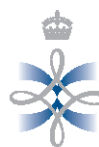

THE QUEEN'S  
ANNIVERSARY PRIZES  
FOR HIGHER AND FURTHER EDUCATION  
2015

## **Supplementary Table S4 – List of reports of ≥5 kidney transplant recipients by country and centre**

| <b>Study</b>          | <b>Timeframe (2020)</b>                           | <b>Centres</b>                                                                                                                                                                                                                                                                                                                                                                                                                                                                                                                                                                                                                      | <b>Cases</b> |
|-----------------------|---------------------------------------------------|-------------------------------------------------------------------------------------------------------------------------------------------------------------------------------------------------------------------------------------------------------------------------------------------------------------------------------------------------------------------------------------------------------------------------------------------------------------------------------------------------------------------------------------------------------------------------------------------------------------------------------------|--------------|
| <b>International</b>  |                                                   |                                                                                                                                                                                                                                                                                                                                                                                                                                                                                                                                                                                                                                     |              |
| <i>Kates et al</i>    | 7 March to 15 April                               | >50 transplant centres, >98% USA                                                                                                                                                                                                                                                                                                                                                                                                                                                                                                                                                                                                    | 318          |
| <i>Cravedi et al*</i> | 2 March to 15 May                                 | AOU Ospedali Riuniti, Ancona, Italy<br>University of Padova, Padova, Italy<br>Azienda Ospedaliera-Universitaria Parma, Parma, Italy<br>University Hospital of Verona, Verona, Italy<br>Hospital del Mar, Barcelona, Spain<br>Complejo Hospitalario de Navarra, Pamplona, Spain<br>Beth Israel Deaconess Hospital, Boston, USA<br>Brigham & Women’s Hospital, Boston, USA<br>Massachusetts General Hospital, Boston, USA<br>University of Colorado School of Medicine, Aurora, USA<br>Montefiore Medical Center, New York City, USA<br>Mount Sinai Hospital, New York City, USA<br>Stanford University Medical Center, Stanford, USA | 144          |
| <b>Belgium</b>        |                                                   |                                                                                                                                                                                                                                                                                                                                                                                                                                                                                                                                                                                                                                     |              |
| <i>Devresse et al</i> | 14 March to 15 April                              | Cliniques Universitaires Saint-Luc, Brussels                                                                                                                                                                                                                                                                                                                                                                                                                                                                                                                                                                                        | 22           |
| <b>China</b>          |                                                   |                                                                                                                                                                                                                                                                                                                                                                                                                                                                                                                                                                                                                                     |              |
| <i>Zhang et al</i>    | 1 January to 28 February; follow-up until 4 March | Tongji Medical College, Wuhan                                                                                                                                                                                                                                                                                                                                                                                                                                                                                                                                                                                                       | 5            |
| <i>Zhu et al</i>      | Follow-up to 16 March                             | Five hospitals including Tongji Medical College, Wuhan                                                                                                                                                                                                                                                                                                                                                                                                                                                                                                                                                                              | 10           |
| <b>France</b>         |                                                   |                                                                                                                                                                                                                                                                                                                                                                                                                                                                                                                                                                                                                                     |              |

|                              |                                           |                                                                                        |    |
|------------------------------|-------------------------------------------|----------------------------------------------------------------------------------------|----|
| Benotmane <i>et al</i>       | 4 March to 7 April; followed-up to 13 May | Strasbourg University Hospital, Strasbourg                                             | 40 |
| <b>Iran</b>                  |                                           |                                                                                        |    |
| Abrishami <i>et al</i>       | 25 February to 12 April                   | Shahid Beheshti University of Medical Sciences, Tehran                                 | 12 |
| Ghaffari Rahbar <i>et al</i> | 20 February to 15 April                   | Shahid Beheshti University of Medical Sciences, Tehran                                 | 19 |
| Monfared <i>et al</i>        | 20 February to 19 April                   | Razi Hospital, Rasht                                                                   | 22 |
| Abolghasemi <i>et al</i>     | 20 March to 20 May                        | Shahid Beheshti University of Medical Sciences, Tehran                                 | 24 |
| <b>Italy</b>                 |                                           |                                                                                        |    |
| Vistoli <i>et al</i>         | Up to 17 March                            | National survey                                                                        | 60 |
| Alberici <i>et al</i>        | Up to 24 March                            | Spedali Civili Hospital, Brescia                                                       | 20 |
| Manganaro <i>et al</i>       | Up to 27 March                            | Regional registry, Piedmont and Aosta Valley                                           | 26 |
| Bossini <i>et al</i>         | 1 March to 16 April                       | Spedali Civili Hospital, Brescia<br>Crema Hospital, Crema<br>Cremona Hospital, Cremona | 53 |
| Mella <i>et al</i>           | 4 March to 17 April                       | Città della Salute e della Scienza Hospital, Turin                                     | 6  |
| Maritati <i>et al</i>        | 17 March to 6 May                         | AOU Ospedali Riuniti, Ancona                                                           | 5  |
| <b>Netherlands</b>           |                                           |                                                                                        |    |
| Hoek <i>et al</i>            | 27 February to 30 April                   | Erasmus University Medical Center, Rotterdam                                           | 23 |
| <b>Portugal</b>              |                                           |                                                                                        |    |
| Silva <i>et al</i>           | Up to end of March                        | Centro Hospitalar e Universitário do Porto, Porto                                      | 5  |
| <b>Spain</b>                 |                                           |                                                                                        |    |

|                                |                                              |                                                                                                                                                                                                              |     |
|--------------------------------|----------------------------------------------|--------------------------------------------------------------------------------------------------------------------------------------------------------------------------------------------------------------|-----|
| Fernández-Ruiz <i>et al</i>    | 5 March to 23 March; follow-up until 4 April | Hospital Universitario 12 de Octubre, Madrid                                                                                                                                                                 | 8   |
| Sánchez-Álvarez <i>et al</i>   | 18 March to 11 April                         | Spanish Society of Nephrology national registry                                                                                                                                                              | 289 |
| Pascual <i>et al</i>           | 17 March to 18 April                         | Spanish Society of Nephrology national registry                                                                                                                                                              | 24  |
| Crespo <i>et al</i>            | March 12 to 4 April; follow-up to 2 May      | Hospital del Mar, Barcelona                                                                                                                                                                                  | 16  |
| Pérez-Sáez <i>et al</i>        | Up to 9 May (follow-up to 15 May)            | Spanish Society of Nephrology national registry                                                                                                                                                              | 80  |
| Rodríguez-Cubillo <i>et al</i> | 15 March to 24 April; follow-up to 19 May    | Hospital Clinico San Carlos, Madrid                                                                                                                                                                          | 29  |
| <b>Switzerland</b>             |                                              |                                                                                                                                                                                                              |     |
| Tschopp <i>et al</i>           | 9 March to 6 April                           | Swiss Transplant Cohort Study national registry                                                                                                                                                              | 21  |
| <b>Turkey</b>                  |                                              |                                                                                                                                                                                                              |     |
| Demir <i>et al</i>             | 1 February to 4 May                          | Florence Nightingale Hospital, Istanbul<br>Gaziosmanpasa Hospital, Istanbul<br>Istanbul University, Istanbul<br>Kartal Dr. Lutfi Kirdar Training and Research Hospital, Istanbul<br>Koc University, Istanbul | 40  |
| <b>UK</b>                      |                                              |                                                                                                                                                                                                              |     |
| Banerjee <i>et al</i>          | Up to end of March                           | Epsom and St Helier University Hospitals NHS Trust, Carshalton<br>King's College Hospital NHS Foundation Trust, London<br>St George's University Hospitals NHS Foundation Trust, London                      | 7   |
| Mohamed <i>et al</i>           | Up to end of April                           | Barts Health NHS Trust, London                                                                                                                                                                               | 28  |
| Ravanan <i>et al</i>           | 1 February to 20 May                         | NHS Blood and Transplant national registry, England                                                                                                                                                          | 489 |
| Bell <i>et al</i> (pre-print)  | Up to 31 May                                 | Scottish Renal Registry, Scotland                                                                                                                                                                            | 24  |
| <b>USA</b>                     |                                              |                                                                                                                                                                                                              |     |
| Boyersky <i>et al</i>          | Up to 24 March to 31 March                   | National survey                                                                                                                                                                                              | 103 |



|                                 |                                   |                                                                                                   |    |
|---------------------------------|-----------------------------------|---------------------------------------------------------------------------------------------------|----|
| Mohan <i>et al</i>              | Up to 27 March                    | Columbia University Irving Medical Center, New York City                                          | 15 |
| Nair <i>et al</i>               | 1 March to 27 March               | Northwell Health healthcare network (12 acute hospitals), across New York state                   | 10 |
| Akalin <i>et al</i>             | 16 March to 1 April               | Montefiore Medical Center, New York City, USA                                                     | 36 |
| Pereira <i>et al</i>            | 13 March to 3 April               | Columbia University Irving Medical Center, New York City<br>Weill Cornell Medicine, New York City | 51 |
| Husain <i>et al</i>             | 13 March to 6 April               | Columbia University Irving Medical Center, New York City                                          | 41 |
| Chen <i>et al</i>               | 18 March to 10 April              | State University of New York Health Sciences University Hospital, New York City                   | 30 |
| Mehta <i>et al</i>              | 15 March to 12 April              | New York University Langone Health, New York City                                                 | 34 |
| Chaudhry <i>et al</i>           | 20 March to 18 April              | Henry Ford Health System (5 hospitals), across Michigan state                                     | 38 |
| Lubetzky <i>et al</i>           | 13 March to 20 April              | Weill Cornell Medicine, New York City                                                             | 54 |
| Yi <i>et al</i>                 | 1 January to 22 April             | Houston Methodist Hospital, Houston                                                               | 21 |
| Fung <i>et al</i>               | 9 March to 28 April               | University of California San Francisco, San Francisco                                             | 7  |
| Santos <i>et al</i> (pre-print) | Up to 4 June; follow-up to 4 July | Rush University Medical Center, Chicago                                                           | 14 |

---

\*Excluded patients included in prior publications
